# Supplementary material for: Ceramide synthesis regulates T cell activity and GVHD development
Source: JCI journal article supplement (doi:10.1172/jci.insight.91701), 2017-05-17
Supplement: sd1 [file 1]

You are being redirected.
